# Supplementary material for: Tunable blue-green emitting and energy transfer of a Eu2+/Tb3+ codoped Sr3La(PO4)3 phosphor for near-UV white LEDs
Source: Royal Society of Chemistry journal article supplement (doi:10.1039/c5nj01903f), 2015-01-01
Supplement: c5nj01903f1.pdf [file c5nj01903f1.pdf]

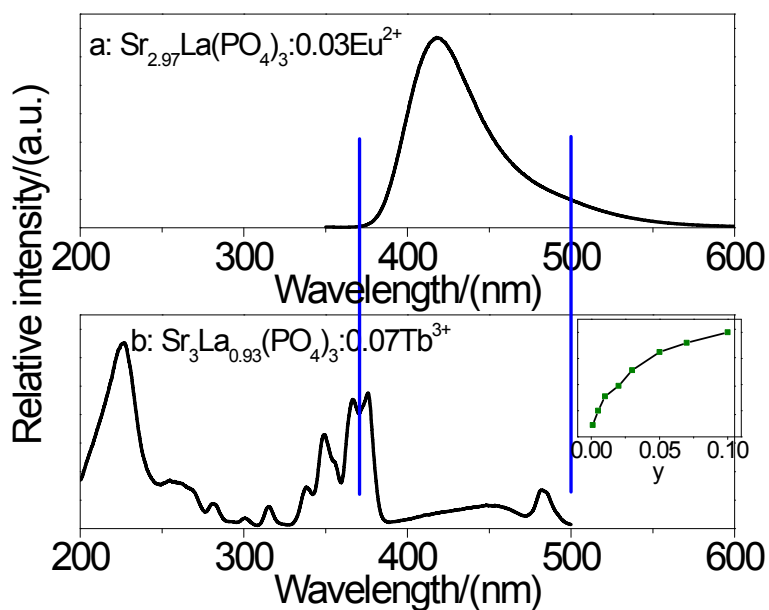

Figure S1 Emission spectrum of  $\text{Sr}_{2.97}\text{La}(\text{PO}_4)_3:0.03\text{Eu}^{2+}$  (a) and excitation spectrum of  $\text{Sr}_3\text{La}_{0.93}(\text{PO}_4)_3:0.07\text{Tb}^{3+}$  (b).  
Inset (b): Emission intensities of  $\text{Sr}_3\text{La}_{1-y}(\text{PO}_4)_3:y\text{Tb}^{3+}$  as a function of  $\text{Tb}^{3+}$  concentrations ( $y=0.001-0.10$ )

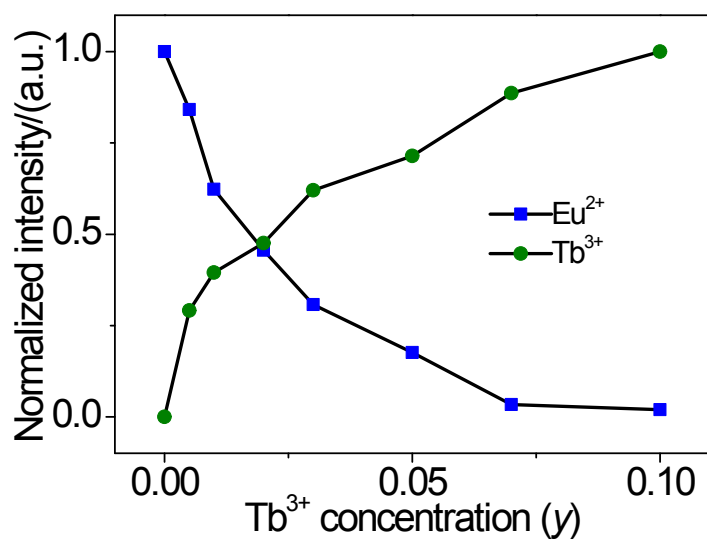

Figure S2 Emission intensities of  $\text{Eu}^{2+}$  and  $\text{Tb}^{3+}$  in  $\text{Sr}_{2.97}\text{La}_{1-y}(\text{PO}_4)_3:0.03\text{Eu}^{2+}, y\text{Tb}^{3+}$  ( $y=0-0.10$ ) with different  $\text{Tb}^{3+}$  concentrations.
